# Supplementary material
Source: publisher figshare collection journal article supplement (https://frontiersin.figshare.com/ndownloader/files/18088856)

A

RORC

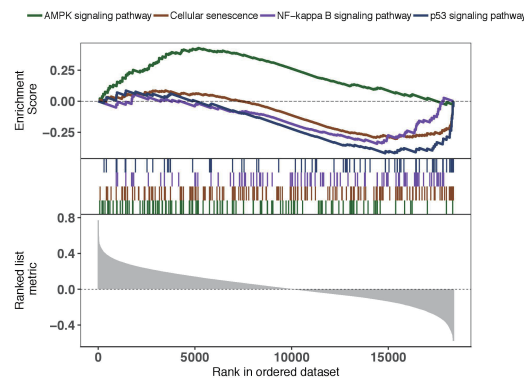

B

NR1D2

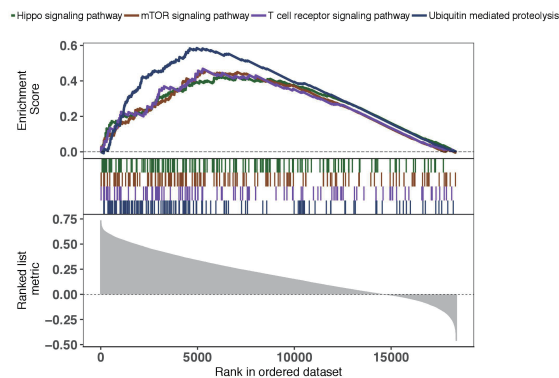

C

CRY2

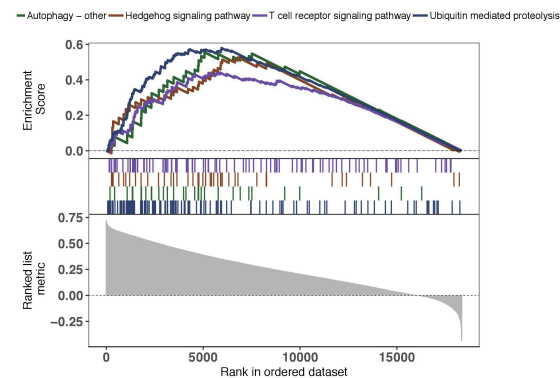

D

RORB

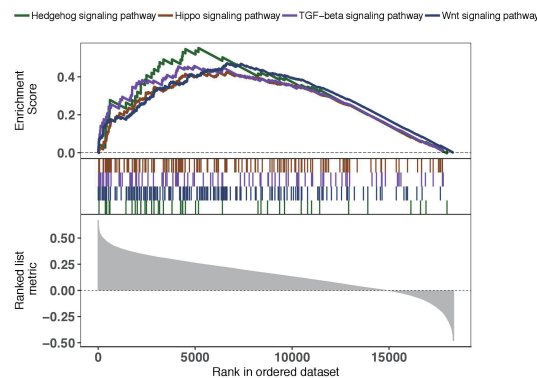

E

NR1D1

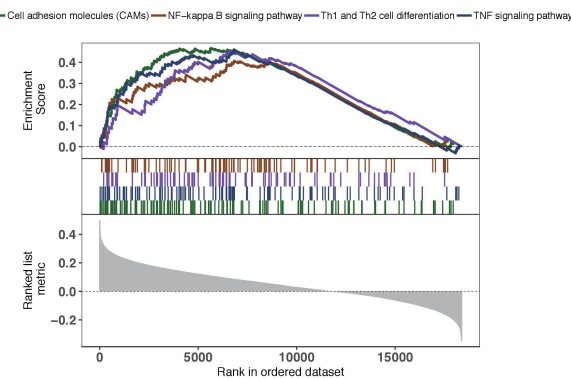

F

CLOCK

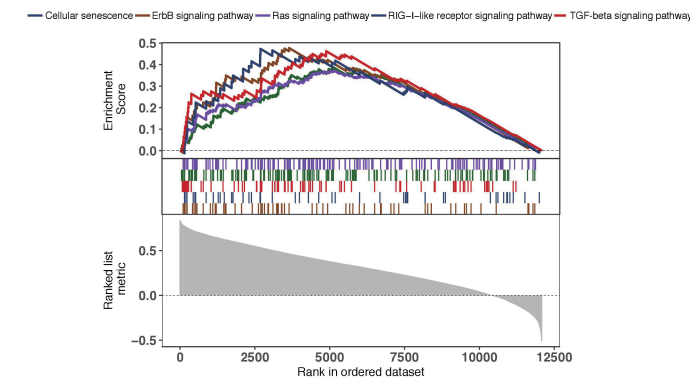

G

PER3

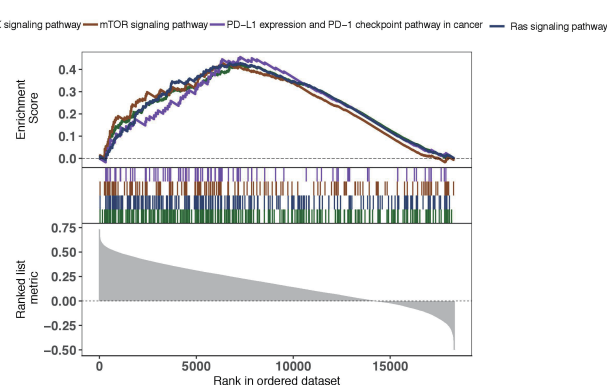

H

CRY2

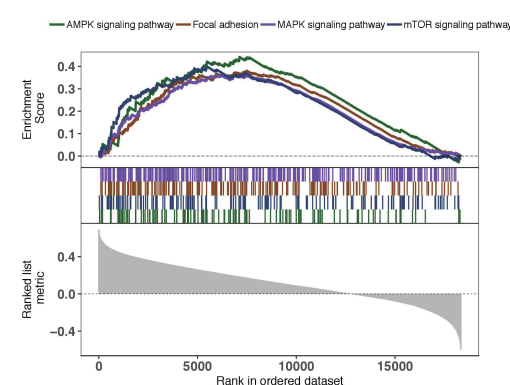

I

ARNTL

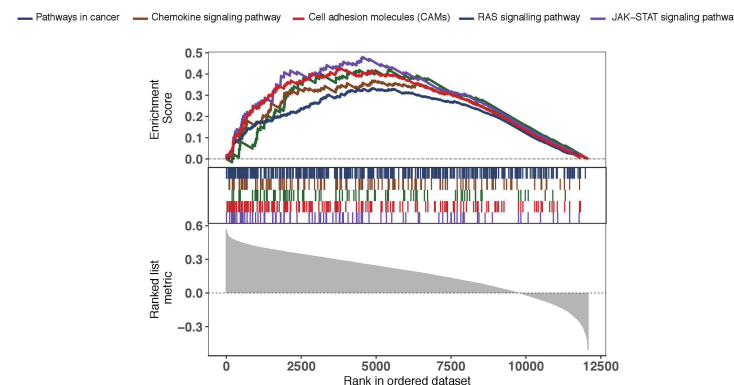

J

PER2

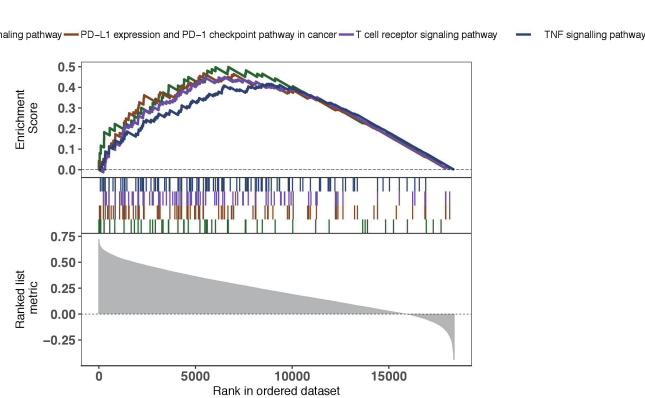

K

NPAS2

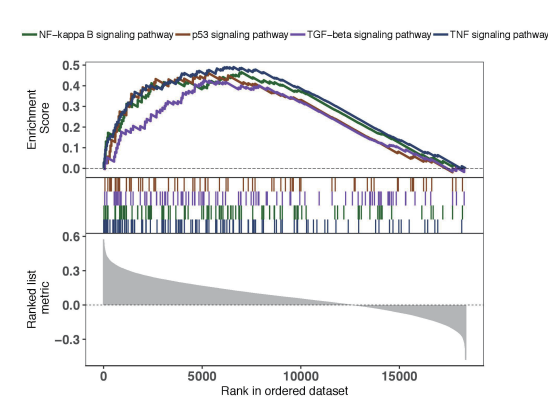

L

ARNTL2

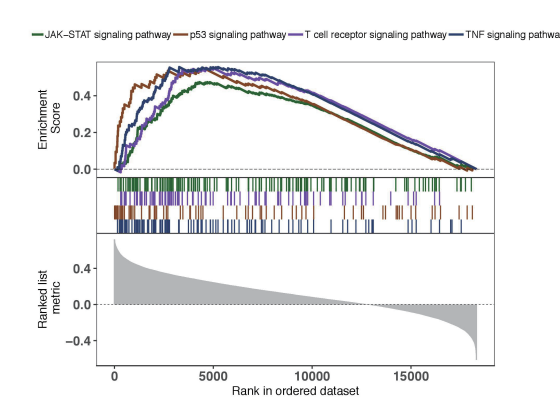

Supplement: Supplementary file [file 18088856]
